# Supplementary material
Source: PubMed Central journal article supplement (PMC2953418)
Supplement: NIHMS234582-supplement-Supplementary_Data.pdf [file NIHMS234582-supplement-Supplementary_Data.pdf]

# Supporting Online Material for

## Redirection of silencing targets by adenosine-to-inosine editing of miRNAs

Yukio Kawahara,\* Boris Zinshteyn, Praveen Sethupathy, Hisashi Iizasa, Artemis G. Hatzigeorgiou,  
Kazuko Nishikura\*

\*To whom correspondence should be addressed.  
Email: ykawahara@wistar.org or kazuko@wistar.org

### This PDF file includes:

Materials and Methods  
Fig. S1 to S3  
Tables S1 to S3  
References

## Materials and Methods

### Mice

All procedures involving mice were approved by the Institutional Animal Care and Use Committee of The Wistar Institute and performed in accordance to the US National Institutes of Health Guidelines.

### RNA preparation

Human total RNA was obtained from Clontech (Palo Alto, CA) and Ambion (Austin, TX). A set of human RNAs and genomic DNA extracted from the brain of a single individual was obtained from BioChain Institute (Hayward, CA). Mouse total RNA was extracted from dissected tissues using TRIZOL reagent according to the manufacturer's instructions (Invitrogen, Carlsbad, CA). Small RNA (<200 nt) was extracted from 50 µg of total RNA using mirVana™ miRNA Isolation Kit (Ambion).

### Determination of pri-miR-376 cluster RNA editing sites

First-strand cDNA was synthesized using 1 µg of total RNA extracted from human or mouse tissues and miR-376-specific RT primers. The resultant cDNA was then amplified by PCR using PCR primers. RT-PCR products were directly sequenced. The editing frequency was determined as the % ratio of the "G" peak over the sum of "G" and "A" peaks of the sequencing chromatogram. Two independent measurements were done, which gave identical values. We confirmed that editing frequency determined by this method was not significantly different from that determined by sequencing of ~50 individual cDNA clones. Furthermore, we compared a set of "individual" human or mouse genomic DNA and pri-miR-376 RNA (cDNA) sequences and excluded the SNP possibility at any of the miR-376 RNA editing sites.

### RT-PCR primers used for amplification of various pri-miR-376 RNAs

Primer sequences for RT-PCR of pri-miRNAs are listed. RT was conducted by using PriRV, then PCR was conducted by using PriFW and PriRV. Sizes of PCR products are shown in parentheses.

#### Pri-hs-miR-B1 (358 bp)

PriFW; 5'-TCTCCTGACCTTGTGATCTGCC-3'

PriRV; 5'-GCCCCTAATTGGTTTCTTCCG-3'

**Pri-hs-miR-B2 (287 bp)**

PriFW; 5'-GCAAAGTGCTCACCTGCTTCT-3'

PriRV; 5'-TCCCAGGACAGACCTTGCTAA-3'

**Pri-hs-miR-368 (287 bp)**

PriFW; 5'-TTAGCAAGGTCTGTCCTGGGA-3'

PriRV; 5'-ATTGTCTCTTCCCTGATGGTGG-3'

**Pri-hs-miR-376a2 (280 bp)**

PriFW; 5'-TGGGCTCCGTCGTCATTTT-3'

PriRV; 5'-CCATCTTCCACTTACCCTGGA-3'

**Pri-hs-miR-654 (231 bp)**

PriFW; 5'-ATCAAATGCTGCCTTGGGATC-3'

PriRV; 5'-GCAACCGTTTTTCAGTCCCGTA-3'

**Pri-hs-miR-376b (267 bp)**

PriFW; 5'-ACAGGCTGTGGTGTGTTGTCAC-3'

PriRV; 5'-GGCTACCATCTTTGCACCTAC-3'

**Pri-hs-miR-376a1 (282 bp)**

PriFW; 5'-TGTGGGTCTCGTGGTGCCA-3'

PriRV; 5'-TGTGTCTGTCCGTCCTGTAC-3'

**Pri-mm-miR-376c (305 bp)**

PriFW; 5'-ACAGCCAGGTTGTTCCCTGGAA-3'

PriRV; 5'-ACATGCTCTGTGGACCACTGAC-3'

**Pri-mm-miR-376b (292 bp)**

PriFW; 5'-AGGCGCCTTTCAACATTCTG-3'

PriRV; 5'-CCACGCCCCACTCATTATTACA-3'

**Pri-mm-miR-376a (236 bp)**

PriFW; 5'-TCTGATATACCGCCTTTTGGG-3'

PriRV; 5'-CGCTTCTTCGGTGAAGATGTC-3'

**Pri-mm-miR-300 (316 bp)**

PriFW; 5'-GGGCATGTGAATCATCTGGAA-3'

PriRV; 5'-TAGGGTCAGACGAAGAAGGAGC-3'

**Characterization of mature miR-376a RNAs**

Preparation of a cDNA library enriched in small RNA (<200 nt) was described previously (1). Briefly, 1.5 µg of small RNA was polyadenylated using the Poly(A) Tailing Kit (Ambion). A 5' adaptor (5'-CGACUGGAGCACGAGGACACUGACAUGGACUGAAGGAGUAGAAA-3') synthesized by Dharmacon (Lafayette, CO) was ligated to poly(A)-tailed RNA using T4 RNA ligase followed by RT using an RT primer: 5'-ATTCTAGAGGCCGAGGCCGACATG-d(T)<sub>30</sub> (A, G, or C) (A, G, C, or, T)-3'. The resultant cDNA was then amplified by using PCR primers matFW, corresponding to the 5'

adaptor sequence, and a set of miR-376 isoform-specific primers to examine the 5' end sequences including editing sites. For examining the 3' end sequences, PCR was done by using PCR primers matDW, corresponding to the 3' linker sequence, and a set of miR-376 isoform-specific primers. RT-PCR products were subcloned, and more than 50 individual cDNA isolates representing each miR-376 cluster member were sequenced. Editing frequency of mature miRNAs was estimated as the % ratio of the cDNA clones containing the A→G change over the total cDNA clones examined.

### PCR primers used for cloning of mature miR-376 cluster RNAs

Primer matFW (5'-CTGACATGGACTGAAGGA-3') corresponds to the 5' adaptor sequence and matRV (5'-ATTCTAGAGGCCGAGGCCGCGACATGT-3') to the 3' linker sequence. PCR primers used for amplification of specific mature miR-376 RNAs (indicated by green letters) are listed below. The unique nucleotide present within the PCR-extended region of each miR-376 RNA is highlighted in gray. This unique nucleotide(s) made it possible to distinguish cDNA clones derived from related miR-376 isoforms. See Fig. S2 for alignment of all pri-miR-376 RNA sequences. Editing sites are indicated by "A"s in red. We could not clone human miR-B1-3p and miR-B2-3p molecules.

#### hs-miR-B1-3p (matFW/matB1-3pRV; 51 bp)

hs-miR-B1-3p 5' -AUCACAAGAGGAAGUACCAUCAGG-3'  
 Primer matB1-3pRV 3' -CTCCTTCATGGTAGTCCC-5'

#### hs-miR-B2-3p (matB2-3pFW/matRV; 81 bp)

hs-miR-B2-3p 5' -AUCAUAGAGGAAAUCCGCAUUU-3'  
 Primer matB2-3pFW 5' -AATCATRGAGGAAAATCCG-3' (R; A or G)

#### hs-miR-368-3p (matFW/mat368-3pRV; 49 bp)

hs-miR-368-3p 5' -ACAUAAGAGGAAAUCCACGUUU-3'  
 Primer mat368-3pRV 3' -CTCCTTTAAGGTGCAAAT-5'

#### hs-miR-376a2-5p (matFW/mat376a2-5pRV; 51 bp)

hs-miR 376a2-5p 5' -GUAGAUAUCCUUCUAUGGUU-3'  
 Primer mat376a2-5pRV 3' -GGAAGATACCAATGCAC-5'

#### hs-miR-376a1-5p (matFW/mat376a1-5pRV; 51 bp)

hs-miR376a1-5p 5' -GGUAGAUAUCCUUCUAUGAGU-3'  
 Primer mat376a1-5pRV 3' -AGGAAGATACTCATTTT-5'

#### hs-miR-376a1-3p, hs-miR-376a2-3p & hs-miR-376b-3p (matFW/mat376-3pRV; 51 bp)

hs-miR-376a1 (or2) -3p 5' -AUCAUAGAGGAAAUCCACGU-3'  
 hs-miR-376b-3p 5' -AUCAUAGAGGAAAUCCAUGUU-3'  
 Primer mat376-3pRV 3' -CTCCTTTTAGGTRCAWTTTT-5' (R; A or G, W; A or T)

#### mm-miR-376a-5p (matFW/mat376a-5pRV; 51 bp)

mm-miR-376a-5p 5' -GGUAGAUAUCCUUCUAUGAGU-3'  
 Primer mat376a-5pRV 3' -GAGGAAGATACTCATTTT-5'

#### mm-miR-376a-3p (matFW/mat376a-3pRV; 53 bp)

mm-miR-376a-3p 5' -AUCGUAAGAGGAAAUCCACGU-3'  
 Primer mat376a-3pRV 3' -CTCCTTTTAGGTGCATTTTTTT-5'

**mm-miR-376b-3p (matFW/mat376b-3pRV; 49 bp)**  
mm-miR-376b-3p 5'-AUCAUAGAGGAACAUCACUU-3'  
Primer mat376b-3pRV 3'-CTCCTTGTAGGTGAATTT-5'

**mm-miR-376c-3p (matFW/mat376c-3pRV; 49 bp)**  
mm-miR-376c-3p 5'-AACAUAGAGGAAUUUCACGU-3'  
Primer mat376c-3pRV 3'-CTCCTTTAAAGTGCATTT-5'

## Target prediction program

There are two major categories of mammalian miRNA-target interactions: (1) 5'-dominant and (2) 3'-compensatory (2). For a detailed description of these categories, we refer the reader to further publications (2-5). Most existing computational approaches focus primarily on predicting 5'-dominant interactions, though a very recent work from the Cohen lab makes a substantial effort to define rules for the prediction of 3'-compensatory interactions (6). These rules, however, have not been applied to the human genome and also have not yet been packaged into a publicly usable program. Therefore, we implemented an in-house algorithm that predicts both 5'-dominant and 3'-compensatory interactions. For 5'-dominant interactions we searched the human 3' UTR dataset for any 7-mer which has perfect base pairing to the miRNA seed sequence (nucleotides 1-7 or 2-8 starting from the miRNA 5'-end). For 3'-compensatory interactions we first searched the human 3' UTR dataset for any k-mer, where  $7 \leq k \leq 8$ , whose perfect base pairing to the miRNA seed sequence is interrupted by either: (a) a single G:U wobble when  $k=7$ , or (b) a single G:U wobble, a nucleotide bulge, or mismatch when  $k=8$ . We also searched for any k-mer, where  $4 \leq k \leq 6$ , which has a perfect base pairing to a portion of the seed sequence starting at either position 1 or 2 from the miRNA 5'-end. We call any such k-mer a *seed match*. We then used RNAhybrid to hybridize the non-seed sequence of the miRNA to the region immediately upstream of the seed match in order to compute the minimum free energy (MFE) hybridization of the non-seed. We considered the region (upstream of seed match + seed match) as a putative target site only if the MFE of the non-seed passes a specified threshold. The value of this threshold depends on the value of k for the corresponding k-mer/seed match. Thresholds were chosen as described previously by Stark et al. (6). Additionally, for 3'-compensatory target sites, we also searched for any 22-mer which binds to at least 80% of the entire mature miRNA, but allows G:U wobbles – although no more than one in the first consecutive four base pairings from the 5'-end of the miRNA. For conservation filtering, we defined human/mouse target site conservation as follows: (1) if  $k=7$  or  $k=8$ , then no nucleotide differences allowed between the human and mouse seed match region, except for the special case where a single nucleotide difference introduces a G:U wobble base pair, or (2) if  $4 \leq k \leq 6$ , then no nucleotide differences allowed between the human and mouse seed match region and at least 80% overall target sequence identity.

Applied to the entire human genome, the program predicted 2,250 target genes for the unedited-version and 2,621 target genes for the edited-version of miR-376a-5p. We then searched for target genes with at least one target site conserved among different species (Table S2), which reduced the predictions to 327 for the unedited version and 301 for the edited version (Fig. S3A). Finally, we further filtered the predictions to retain those that have multiple target sites (at least one site conserved) yielding 78 target genes for unedited miR-376a-5p and 82 for edited miR-376a-5p (listed in Table S3 and Fig. S3A). We randomly selected three target genes from each of these two final prediction sets that have two binding sites within 1 kb for experimental verification.

## Luciferase reporters

PCR products containing miR-376a-5p binding sites were amplified from human cDNAs pooled from brain, thymus, lung, spleen and liver, and then inserted into the multiple cloning sites in the luciferase reporter vector (pMIR-REPORT™ Luciferase; Ambion) (Fig. S3C). Primer sequences and potential binding sites are listed below.

### PCR primers used for amplification of miR376a1-5p unedited-version targets

Sequences inserted into the luciferase reporter vectors are shown. Two predicted binding sites are boxed. Primer sequences with linker sequences (*bold*) are underlined.

>SFRS11 (arginine/serine-rich splicing factor 11) 546 bp

**CATCCACTAGT**TGCACTAACCTTTTTTGGTGGCTAATTAGGGTTTAAATACAGAAACAAGATTTCAAAT  
AAAACGTCTTTGGCAGTGAGTAAATAGCATATTTTGAAGTAGAGTTGTATACTTTTTTCATAAGATGTT  
TGGAATTTTTTTCCTGAAGTAATAATTTATTCACATCTACATCAGTGAAAGCTATCTACCATATCCTG  
AGTCTATCTTAAAGGAAAAAAGAAAAAACCTTATCTCTTGCCTTATTTTGAATTTTCCACTCTTTC  
ATTAATTTGTTTTAAGCTCCGTGTTGGAAAAAGGGTAGTGCATTTTAAATTGACCTTCATA**CGCTTT**  
**TAAAATAAGACAAATCTACT**TGATAATGTACCTTTATTTGATCTCAAGTTGTATAAAACCAATAAATTT  
GTGTTACTGCAGTAGTAATCTTATGCACACGGTGATTTTCATGTTATATATGCAAAGTAGGCAACTGTTT  
TCTTAGTTACAGAAGTTTCAAGCTTCACTTTTGTGCAGTAGAAACAAAAGTAGGCTACAGTCTGTGCCA  
**TGTTGACGCGTGGATG**

>SLC16A1 (solute carrier family 16-A1 or monocarboxylic acid transporter 1 MCT 1) 981 bp

**CATCCACTAGT**TGAGCAGTTCATGACCCAGGATATCTGAAAA**TATTCTACTGGCCTGTAATCTACC**AGT  
GGTGCTCAATGCAAATAGTAGACATTTGTGTGGAAATCATAACCAGTTGTTTCATTGATGGGATTTTTGTT  
TGACTCCTTACCAATAGCCTGAATTTGAGGAGGGAATGATTGGTAGCAAAGGATGGGGGAAAGAAGTAG  
GTTCTGTTTTGTTTTGTTTTAATCTTAGCTTTTAAATAGTGCATAAAGATTATAATATGTGCCTTAAGT  
TTTAGTCTTTAGAACTCTAGAGAGCCTTAACTTCTTAAACCATTTTTGCTGAATTCATCTATTTTCGAGT  
GTTGTGTTAAAAGGAAAAATAACAACACTACTGTTTGGAGCAAATCTAAAATTTAAAATTAATCTTGCT  
TCATTGTTACATGTAATATATTTTCAGACATTTTCACTGGAAGATTTATGAACAGAAATATTGGTTGAAA  
GTTAGAGATTTTACAAAATGCTGACAAAAATATTTTTCTTAGCATCAGTAGATTTCTGGCATATGTTTCT  
GCTAGCTATATATTTAGGAAATTCAAAGCATAAACTTTGGCAACATCTTGGCTGTTCTAGACACAGTG  
TACTTGTCAACCCCTCTCAGGTACCTTTTCTGGGATGCTTATTAGAAGCCAAGTAAAGTGCTTAAGGT  
TTGTTTTCATTAATTAGCTATTTCTGCTCCCTGTTCAAAGATGCATTTTGGAGTGTATATAGATCACT  
GCCCTTTTTGAAATCACCTGGTATTATTTTTCTTACTGGA**AAAGTTAGTATTTAAAATCTACA**GAACTAC  
ATATTTGTGCCTCCTTGGTAAATACAACACATCTAATTAATGTAGACAGATATTTCAAACATCAGCTG  
AATTCACTTAAGTTTTTCCAAAACCTCAGTTAACTGTGAAGCTATTGGAATTTTTTTTTTCTGGAATT  
TTTCCCTTTGATTCACAGTGGTCCC**AAGCTTGGATG**

>TTK (threonine and tyrosine kinase or monopolar spindle type1, MPS1) 445 bp

**CATCCACTAGT**CCAAATGGCCAAGGGAACCACTGAAGAAATGAAATATGTTCTGGGCCAACTTGTTGGT  
CTGAATTCCTCAACTCCATTTTGAAGCTGCTAAAACTTTATATGAACACTATAGTGGTGGTGAAGT  
CATAATTCCTCATCCTCCAAGACTTTTGAATAAAAAAGGGGAAAAAATGATTTGCAGTTATTCGTAAT  
GTCAaATACCACCTATAAAATATATTGGACTGTTA**TACTCTTGAATCCCTGTGGAAATCTAC**ATTTGAA  
GACAACATCACTCTGAAGTGTATCAGCAAAAAAATTCAGTAGATTATCTTTAAAAGAAAACTGTAAA  
AATAGCAACCACTTATGGtACTGTATATATTGTAGACTTGTTTTCTCTGTTTTA**TGCTCTTGTGTAATC**  
**TACT**TGACATCATTTTACTCTTGGAAATAGTGGGTGGATAGCA**AAGCTTGGATG**

## PCR primers used for amplification of miR376a-5p edited-version targets

>PRPS1 (phosphoribosyl pyrophosphate synthetase 1) 718 bp

**CATCCACTAGT**GCCATCAGGAGAAGACTCACAAATGGAGAATCCGTTTCTTACCTATTCAGCCATGTCCCTTATAATAGAGTAACTTCTGAGGCTTTTGGAGAATAAAATCCACCCCACCCTTGTTTCCCCTTGGTATTTGATGACAAATTCAGCAGAAGACCCGGCTTGCTCCAGTGTAGCTTTCTACATCCCACATCAGGTATATTA GAGCTTATCCGAAGTGGGGAAAGACGGATTGAGATTAAGTCTGGGACCTCCTACCTGCATTATCTCAT TCTGGCTTCCTTGATAATTCTGTGGGCCTTGCACTTTAACTATAGCTCAGCTGCTGCAAGATTTTCAGA CTTTTGAGGATGTTGTGTGAGGGTGTGACTGTGACTGGGGAAGCTCAGACTACTTTGTATGTGAATG CTTTCAGGGTTTTCTTTGTTGAGAACAAGTAGCAACAAAGGCAACCCATGTGTGACCAGTTCTCCCCAAG GTCTATGCTAAATTATAGCAAGAGCCCTGGGCAACCCCAAACCTAGTCCCTGGTAGCTGAGCACCCCTGTA AGGCAGGAGCAGGCAGCTCAGCTTGAGCAGACATTGGGTGGGGGGTGGGGGGTGGTTGAGGGGGGAGGC AGCACAGTGCAGCAAATGTTTCTTGGGAGGAAGAAGCCTGATCCATCACCATCTGCTTGACTATGTAGC TTGGATTCTCCTTTGTACCTATCCCTTTCGATTTGGCTT**AAGCTTGGATG**

>ZNF513 (zinc finger protein 513) 230 bp

**CATCCACTAGT**AGAAGCCACCTTTTTCTCCCCGCTGGCCAGGGGCTCCACACAGACTAACGTAGGCAC TATAAGGACCAGCCCAACCCCATGGGCGGGGGGGCCATATGGACCAGGGGACCTTGCCTTGACTGAGG CACTTCACGAGCTCAGTGAGAAGGGCCCTGTATTACCCTCCACTGCCCCAGGGGCTGTGGACAAACCG GCTGGGGGACTGCCAGCCTCCACCTGTTTATT**AAGCTTGGATG**

>SNX19 (sorting nexin 19) 567 bp

**CATCCACTAGT**TGCCATCCTCCCTGAGATTGTTTGCAGAATCCTGGCCCTGTGCACACATGTGCTTAA TCCACCAGCACACAAGCTCTAGATAGAACAGGAAAAAACTGTGGCCAGATTTCCCTTGGAGGAGAAAAAC AACCTTCTCAGCTCTCTGTTTCCCTACCCGGAAACTAAAAATTCATTCAGGGCCATTCTCAAAAACCAGAC TCCTGGGTCTAATCTAGTTTCCCAACAGTTCCAGAAGAAGAAGGAGGGAAGAAAATTTTTCAAGGAACT TCTTGCTCATGTGTTGCTGTTTCCCAACACATCAGCCTTATGGAAGATGTCATGAGGCTGCTTGCCTGG GAGGCTACACTTTCCTTCCAGAAGACTTCAAAGCTGACTGCCAAAGCTTCTGGTAAATCCACCCCACC CTTACACCCTTTCCTGAAAGGCATTTATACCACCCATTTTATTTATTGGCTTTGCTCCCAACCCCTG CCCTAGAGCAATTGAGTTTTTGAATTTTACCCTCTCTGTCTTCAGCAAAACTGCATGACAAGCTG CATATTCAGCCTCAGTTTTTTCCAAGG**ACGCGTGGATG**

## Transfections

Both unedited miR376a-5p (adenosine at +4 site) and "edited" miR376a-5p (A→G at +4 site) duplexes were synthesized at Ambion (Pre-miR<sup>TM</sup> miRNA). Edited miR376a-5p (A→I at +4 site) duplex was synthesized at Dharmacon (MiRIDIAN<sup>TM</sup> microRNA Mimic). Mismatches were introduced into duplexes to help promote activation of the sense strand. A negative control miRNA cel-miR-67 (miRIDIAN<sup>TM</sup> microRNA Mimic Negative Control) was also obtained from Dharmacon. All transfections were carried out in triplicate as described previously (7). Briefly, HeLa cells were pre-plated in 24-well tissue culture plates. Two hundred ng of luciferase reporter plasmid and 200 ng of control vector pMIR-REPORT<sup>TM</sup> β-gal Plasmid (Ambion) were diluted into 50 μl Opti-MEM (Invitrogen) with or without 10 pmol of either unedited or edited miR376a-5p duplex, followed by addition of 3 μl of lipofectamine 2000 (Invitrogen). After incubation according to the manufacturer's instructions, 100 μl transfection mixture was added to the HeLa cells in 500 μl of the growth medium. No expression of endogenous mature miR-376 RNAs was detected in HeLa cells. The luciferase activity was measured at 48 hours after transfection, using the Luciferase Assay System (Promega, Madison,

WI), together with the  $\beta$ -galactosidase activity by reading the absorbance at 415nm in a plate reader with  $\beta$ -Galactosidase Enzyme Assay System (Promega).

### **Protein Extraction**

Cerebral cortices and livers of 3 wild-type and 3 *ADAR2 null* mice (12 week old) were minced using a pair of scissors in a buffer containing 0.25 M Tris (pH 7.8), 2 mM MgCl<sub>2</sub>, 1 mM DTT, 1X complete protease inhibitor mixture (Roche Diagnostics, Indianapolis, IN), and 0.5 mM phenylmethylsulfonyl fluoride (PMSF), and kept on ice for 30 min. After sonication followed by centrifugation at 14,000 rpm for 15 min, the supernatant was transferred to new tubes and diluted with an equal volume of a buffer containing 0.1 M Tris (pH 7.0), 0.2 M NaCl, 2 mM MgCl<sub>2</sub>, 40% glycerol, 1 mM DTT, 1X complete protease inhibitor mixture, and 0.5 mM PMSF. After the measurement of the protein concentration, the samples were kept at -80°C until use.

### **Western Immunoblot Analysis**

Cerebral cortex or liver protein extracts of 12 week old wild-type or *ADAR2 null* mice (100  $\mu$ g) were fractionated on an SDS-7% (or 15%) polyacrylamide gel and transferred to Immobilon<sup>TM</sup>-P nylon membrane (Millipore, Bedford, MA) as described previously (8). Blots were blocked in a buffer containing phosphate-buffered saline (PBS), 0.1% Tween-20, and 5% nonfat dry milk. For analysis, we used the following antibodies: anti-TTK (Mps1) polyclonal antibody (Abcam, Cambridge, MA); anti-PRPS1 polyclonal antibody (Novus Biologicals, Littleton, CO); anti-Actin monoclonal antibody (Sigma, St. Louis, MO). The antibodies were diluted (anti-TTK, 1 : 2500; anti-PRPS1 and anti-Actin, 1 : 500), and incubated with the membrane for 1 hr at room temperature. Each protein band was detected by HRP-conjugated secondary antibodies using ECL Western blotting detection reagents (GE Healthcare, Piscataway, NJ). Both TTK and PRPS1 expression level were normalized by that of  $\beta$ -actin.

### **Uric Acid measurement**

Cerebral cortices (0.3 g) and livers (1.0 g) of 6 wild-type and 6 *ADAR2 null* mice (12 weeks old) were minced using a pair of scissors in 3 ml and 10 ml of PBS buffer (pH 7.0), respectively, after removal of blood by perfusion. After sonication followed by centrifugation at 14,000 rpm for 15 min, the supernatants were then filtered through 0.2- $\mu$ m syringe filters (Corning, Corning, NY) and stored at -80°C until use as previously described (9). Uric acid was measured with an Amplex Red-based assay kit (Invitrogen) using 50  $\mu$ l of cerebral cortex extract and 5  $\mu$ l of liver extract in duplicate.

Figure S1

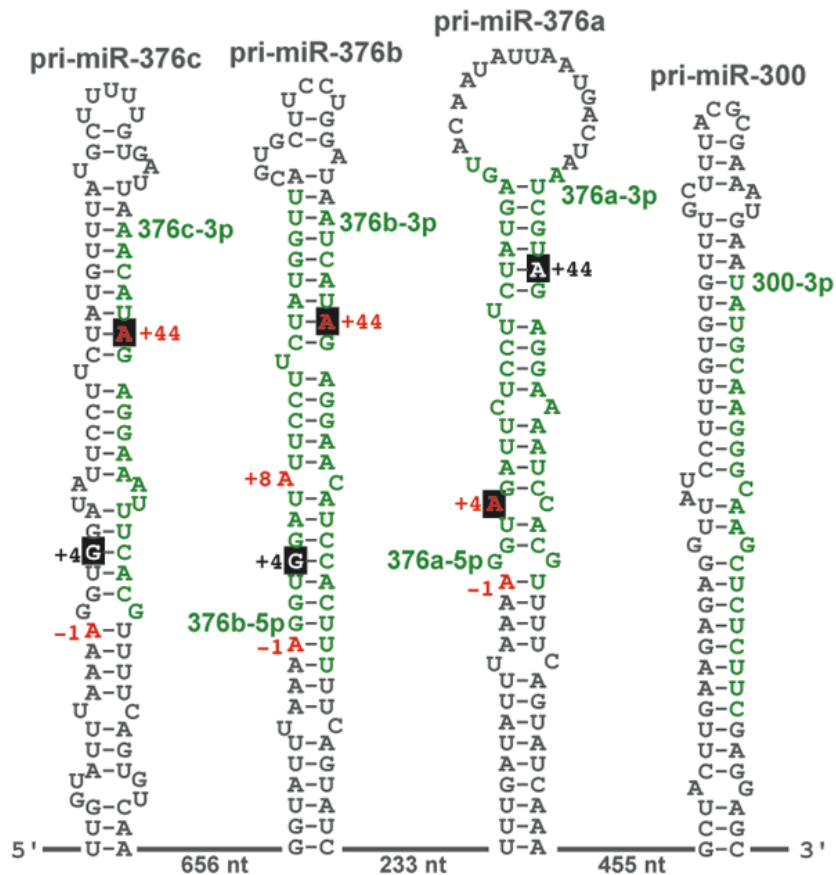

**Mouse miRNA-376 cluster**

**Fig. S1: A→I RNA editing of mouse pri-miR-376 RNAs.** Hairpin structures of three mouse miR-376 cluster pri-miRNAs are shown. Editing sites are indicated by red “A”s. The two most highly edited adenosines (+4 and +44) are indicated by red "A"s highlighted in black. Each individual editing site is numbered, with the 5' end of the human miR-376a1-5p sequence counted as +1. Editing sites of other miR-376 family members are numbered based on the human miR-376a1 hairpin structure. Regions known to be processed into mature miRNAs are highlighted in green. The genomically encoded guanosine at +4 is also highlighted. The genomic distance between miRNA genes is indicated by the numbers at the bottom.



## Figure S2

|              | -1         | +4          | miR-376-5p                   | +44                          | miR-376-3p   |                               |                               |                   |                    |       |
|--------------|------------|-------------|------------------------------|------------------------------|--------------|-------------------------------|-------------------------------|-------------------|--------------------|-------|
| hs-miR-376a1 | GGUAUUUAAA | <u>AGGU</u> | <u>GAUUCUCCUUCUAUGAGUACA</u> | UUUUUAUGAUUA                 | <u>AUCAU</u> | <u>GAGGAAAAUCCACGUUUUCAGU</u> |                               |                   |                    |       |
| hs-miR-376a2 | GGUAUUUAAA | <u>AGGU</u> | <u>GAUUCUCCUUCUAUGSUUAC</u>  | UUUUUAUGAUUA                 | <u>AUCAU</u> | <u>GAGGAAAAUCCACGUUUUCAGU</u> |                               |                   |                    |       |
| ha-miR-376b  | GGUAUUUAAA | <u>AGGU</u> | <u>GAUUCUCCUUCUAUGUUUAC</u>  | UUUUUAUGAUUA                 | <u>AUCAU</u> | <u>GAGGAAAAUCCAGUUUUUCAGU</u> |                               |                   |                    |       |
| hs-miR-368   | GGUAUUUAAA | <u>AGGU</u> | <u>GAUUCUCCUUCUAUGUUUAC</u>  | UUUUUAUGAUUA                 | <u>AUCAU</u> | <u>GAGGAAAAUCCACGUUUUCAGU</u> |                               |                   |                    |       |
| hs-miR-B1    | UGCAU      | UAAAAGGU    | GAUUCUCCUUCUAUGUUUAC         | GGAUUUUAUG                   | UUAAUCA      | AGAGGAAUA                     |                               |                   |                    |       |
| hs-miR-B2    | CCC        | UAAAAGGU    | GAUUCUCCUUCUAUGUUUAC         | GGAUUUUAUG                   | UUAAUCA      | AGAGGAAUA                     |                               |                   |                    |       |
| hs-miR-654   | GGUA       | ACUGCAA     | <u>AGGU</u>                  | <u>GAUUCUCCUUCUAUGAGUACA</u> | UUUUUAUGAUUA | <u>AUCAU</u>                  | <u>GAGGAAAAUCCACGUUUUCAGU</u> |                   |                    |       |
| mm-miR-376a  | GGUA       | ACUGCAA     | <u>AGGU</u>                  | <u>GAUUCUCCUUCUAUGAGUACA</u> | UUUUUAUGAUUA | <u>AUCAU</u>                  | <u>GAGGAAAAUCCACGUUUUCAGU</u> |                   |                    |       |
| mm-miR-376b  | GGUA       | ACUGCAA     | <u>AGGU</u>                  | <u>GAUUCUCCUUCUAUGSUUAC</u>  | UUUUUAUGAUUA | <u>AUCAU</u>                  | <u>GAGGAAAAUCCACGUUUUCAGU</u> |                   |                    |       |
| mm-miR-376c  | GGUA       | ACUGCAA     | <u>AGGU</u>                  | <u>GAUUCUCCUUCUAUGUUUAC</u>  | UUUUUAUGAUUA | <u>AUCAU</u>                  | <u>GAGGAAAAUCCACGUUUUCAGU</u> |                   |                    |       |
| mm-miR-300   | GCUA       | UUCAA       | GAGAC                        | UUUUCUUU                     | UGUGUUUC     | UUUACGCGAA                    | AUCAA                         | <u>AUGCAAAGGC</u> | <u>AAGCUCUCUUC</u> | GACGA |

**Figure S2: Alignment of pri-miR-376 cluster RNA Sequences.** Sequences of all pri-miR-376 cluster RNAs as well as unrelated pri-miR-654 and pri-miR-300 sequences are aligned. Mature miRNA sequences are indicated by green letters and underlines. The sequence difference of all pri-miRNAs in comparison to the human pri-miR-376a1 sequence is highlighted in gray. These unique nucleotide differences made it possible to distinguish cDNA clones derived from related miR-376 isoforms. Editing sites are indicated by “A”s in red. Two major editing sites (+4 and +44 sites) are further highlighted in black.

Figure S3

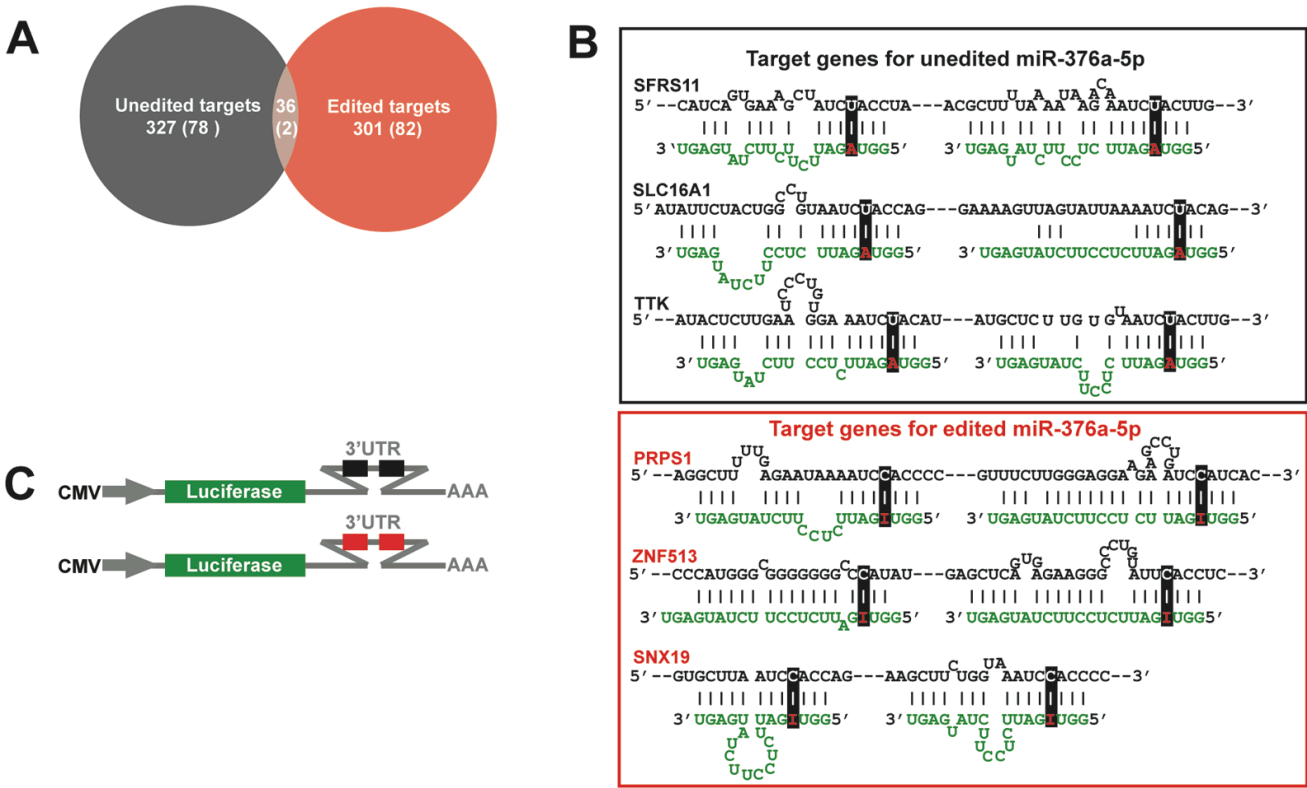

**Fig. S3: Prediction of the targets for edited miR-376a1-5p.** (A) *In silico* prediction of the targets of unedited and edited miR-376a-5p. The number of targets with at least one conserved site, and with multiple target sites (parentheses) is indicated. (B) RNA duplex formation between 3' UTR target sites and unedited or edited miR-376a-5p are diagrammed. The target location that pairs with the +4 site of unedited or edited miR-376a-5p is highlighted. (C) Diagram of luciferase reporter plasmids containing miR-376a-5p unedited-version (black boxes) or miR-376a-5p edited-version (red boxes) target sites in the 3' UTR.

**Table S1: Editing of pri-miR-376 RNAs in human and mouse tissues**

| miRNA        | Tissue                          | Major sites |               |          | Minor sites |         |         |          |          |
|--------------|---------------------------------|-------------|---------------|----------|-------------|---------|---------|----------|----------|
|              |                                 | site -1     | site +4       | site +44 | site -4     | site -3 | site +8 | site +17 | site +42 |
| hs-miR-376a1 | cortex                          | 16          | 46            | 41       |             |         |         |          |          |
|              | medulla                         | 14          | 41            | 25       |             |         |         |          |          |
|              | amygdala                        | 39          | 49            | 45       |             |         |         |          |          |
|              | liver                           | 0           | 0             | 17       |             |         |         |          |          |
|              | lung                            | 17          | 30            | 20       |             |         |         |          |          |
| hs-miR-376a2 | cortex                          | 55          | 90            | 98       | 8           | 13      |         |          |          |
|              | medulla                         | 52          | 97            | 98       | 9           | 17      |         |          |          |
|              | lung                            | 44          | 68            | 90       | 6           | 7       |         |          |          |
| hs-miR-376b  | cortex                          | 0           | Genomically G | 95       |             |         | 7       |          |          |
|              | medulla                         | 6           | Genomically G | 94       |             |         | 18      |          |          |
|              | lung                            | 6           | Genomically G | 55       |             |         | 8       |          |          |
| hs-miR-368   | cortex                          | 23          | Genomically G | 94       |             |         |         | 11       | 14       |
|              | medulla                         | 28          | Genomically G | 96       |             |         |         | 24       | 12       |
|              | lung                            | 19          | Genomically G | 59       |             |         |         | 0        | 0        |
| hs-miR-B1    | cortex                          | 0           | Genomically G | 0        |             |         |         |          |          |
|              | medulla                         | 0           | Genomically G | 0        |             |         |         |          |          |
|              | lung                            | 0           | Genomically G | 0        |             |         |         |          |          |
| hs-miR-B2    | cortex                          | 0           | Genomically G | 13       |             |         |         |          |          |
|              | medulla                         | 7           | Genomically G | 29       |             |         |         |          |          |
|              | lung                            | 8           | Genomically G | 0        |             |         |         |          |          |
| mm-miR-376a  | cortex/wild-type                | 24          | 48            | 0        |             |         |         |          |          |
|              | cortex/ <i>ADAR 2null</i>       | 6           | 9             | 0        |             |         |         |          |          |
|              | heart/wild-type                 | 6           | 12            | 0        |             |         |         |          |          |
|              | kidney/wild-type                | 33          | 38            | 0        |             |         |         |          |          |
|              | liver/wild-type                 | 0           | 7             | 0        |             |         |         |          |          |
|              | lung/wild-type                  | 7           | 28            | 0        |             |         |         |          |          |
|              | E11.5 embryo/wild-type          | 0           | 8             | 0        |             |         |         |          |          |
|              | E11.5 embryo/ <i>ADAR1 null</i> | 0           | 13            | 0        |             |         |         |          |          |
| mm-miR-376b  | cortex/wild-type                | 22          | Genomically G | 52       |             |         | 31      |          |          |

|             |                                 |    |               |    |  |  |    |  |  |
|-------------|---------------------------------|----|---------------|----|--|--|----|--|--|
|             | cortex/ <i>ADAR 2null</i>       | 0  | Genomically G | 78 |  |  | 0  |  |  |
|             | lung/wild-type                  | 0  | Genomically G | 14 |  |  | 17 |  |  |
|             | E11.5 embryo/wild-type          | 0  | Genomically G | 14 |  |  | 0  |  |  |
|             | E11.5 embryo/ <i>ADAR1 null</i> | 0  | Genomically G | 0  |  |  | 0  |  |  |
| mm-miR-376c | cortex/wild-type                | 18 | Genomically G | 66 |  |  |    |  |  |
|             | cortex/ <i>ADAR 2null</i>       | 0  | Genomically G | 96 |  |  |    |  |  |
|             | lung/wild-type                  | 18 | Genomically G | 0  |  |  |    |  |  |
|             | E11.5 embryo/wild-type          | 0  | Genomically G | 40 |  |  |    |  |  |
|             | E11.5 embryo/ <i>ADAR1 null</i> | 0  | Genomically G | 0  |  |  |    |  |  |

**Table S2: Summary of miR-376a-5p target genes**

| # Target Genes                                                        | All genes (with conserved and/or non-conserved target sites) | At least one conserved target site among human, chimp and mouse |
|-----------------------------------------------------------------------|--------------------------------------------------------------|-----------------------------------------------------------------|
| <b>Unedited miR-376a-5p</b>                                           | <b>2250</b>                                                  | <b>327</b>                                                      |
| <b>Edited miR-376a-5p</b>                                             | <b>2621</b>                                                  | <b>301</b>                                                      |
| Common to both                                                        | 732                                                          | 36                                                              |
| Common to both (with same target site)                                | 189                                                          | 17                                                              |
| <b># Target Genes with Multiple Sites (not necessarily conserved)</b> |                                                              |                                                                 |
| <b>Unedited miR-376a-5p</b>                                           | <b>344</b>                                                   | <b>78</b>                                                       |
| <b>Edited miR-376a-5p</b>                                             | <b>487</b>                                                   | <b>82</b>                                                       |
| Common to both                                                        | 66                                                           | 2                                                               |
| Common to both (with same target site)                                | 28                                                           | 0                                                               |

**Table S3: Target genes of unedited and edited miR-376a-5p RNAs**

| Unedited miR-376a-5p target genes with multiple target sites (at least one conserved site) | Edited miR-376a-5p target genes with multiple target sites (at least one conserved site) |
|--------------------------------------------------------------------------------------------|------------------------------------------------------------------------------------------|
| ENSG00000017427                                                                            | ENSG00000071537                                                                          |
| ENSG00000186628                                                                            | ENSG00000155545                                                                          |
| ENSG00000101892                                                                            | ENSG00000065371                                                                          |
| ENSG00000113657                                                                            | ENSG00000096063                                                                          |
| ENSG00000125266                                                                            | ENSG00000103061                                                                          |
| ENSG00000125375                                                                            | ENSG00000141622                                                                          |
| ENSG00000172260                                                                            | <b>ENSG00000163795 (ZNF513)</b>                                                          |
| ENSG00000172057                                                                            | ENSG00000110436                                                                          |
| ENSG00000114127                                                                            | ENSG00000062716                                                                          |
| ENSG00000157617                                                                            | ENSG00000111269                                                                          |
| ENSG00000172493                                                                            | ENSG00000104643                                                                          |
| ENSG00000110680                                                                            | ENSG00000110680                                                                          |
| ENSG00000185640                                                                            | ENSG00000186908                                                                          |
| ENSG00000075391                                                                            | ENSG00000163914                                                                          |
| ENSG00000177098                                                                            | ENSG00000183715                                                                          |
| ENSG00000157020                                                                            | ENSG00000158715                                                                          |
| ENSG00000133121                                                                            | ENSG00000116455                                                                          |
| ENSG00000183715                                                                            | ENSG00000177000                                                                          |
| ENSG00000170624                                                                            | ENSG00000114735                                                                          |
| ENSG00000157680                                                                            | ENSG00000138138                                                                          |
| ENSG00000101856                                                                            | ENSG00000165495                                                                          |
| ENSG00000131697                                                                            | ENSG00000197774                                                                          |
| ENSG00000109171                                                                            | ENSG00000172403                                                                          |
| ENSG00000163743                                                                            | ENSG00000149485                                                                          |
| <b>ENSG00000116754 (SFRS11)</b>                                                            | ENSG00000198915                                                                          |
| ENSG00000153814                                                                            | ENSG00000154478                                                                          |
| ENSG00000137075                                                                            | ENSG00000168314                                                                          |
| ENSG00000135913                                                                            | ENSG00000176276                                                                          |
| ENSG00000147246                                                                            | ENSG00000162599                                                                          |
| <b>ENSG00000155380 (SLC16A1)</b>                                                           | ENSG00000157106                                                                          |
| ENSG00000141150                                                                            | ENSG00000116133                                                                          |
| ENSG00000139350                                                                            | ENSG00000108774                                                                          |
| ENSG00000143437                                                                            | ENSG00000186642                                                                          |
| <b>ENSG00000112742 (TTK)</b>                                                               | ENSG00000077279                                                                          |
| ENSG00000138757                                                                            | ENSG00000161526                                                                          |
| ENSG00000165983                                                                            | ENSG00000166170                                                                          |
| ENSG00000144406                                                                            | ENSG00000101445                                                                          |
| ENSG00000157450                                                                            | ENSG00000172115                                                                          |
| ENSG00000130779                                                                            | ENSG00000115194                                                                          |
| ENSG00000161896                                                                            | ENSG00000101337                                                                          |
| ENSG00000067082                                                                            | ENSG00000187210                                                                          |
| ENSG00000154114                                                                            | ENSG00000134369                                                                          |
| ENSG00000083642                                                                            | ENSG00000185920                                                                          |

ENSG00000174013  
ENSG00000188167  
ENSG00000165424  
ENSG00000070808  
ENSG00000077157  
ENSG00000169991  
ENSG00000073282  
ENSG00000143653  
ENSG00000163071  
ENSG00000087301  
ENSG00000179241  
ENSG00000134121  
ENSG00000119042  
ENSG00000141084  
ENSG00000155111  
ENSG00000101109  
ENSG00000065559  
ENSG00000170044  
ENSG00000167580  
ENSG00000169330  
ENSG00000170921  
ENSG00000044524  
ENSG00000197959  
ENSG00000153234  
ENSG00000135503  
ENSG00000116604  
ENSG00000157224  
ENSG00000102753  
ENSG00000119457  
ENSG00000062725  
ENSG00000115137  
ENSG00000182836  
ENSG00000125447  
ENSG00000101266  
ENSG00000015153

ENSG00000142619  
ENSG00000172137  
ENSG00000160714  
ENSG00000092421  
ENSG00000171604  
ENSG00000100403  
ENSG00000149256  
ENSG00000186702  
ENSG00000002834  
ENSG00000140320  
ENSG00000171152  
ENSG00000103888  
ENSG00000048991  
ENSG00000157483  
ENSG00000196090  
ENSG00000148943  
ENSG00000070366  
ENSG00000175606  
ENSG00000154102  
ENSG00000156687  
ENSG00000022355  
ENSG00000119912  
ENSG00000142149  
ENSG00000139926  
ENSG00000164088  
ENSG00000009307  
ENSG00000113721  
ENSG00000163349  
**ENSG00000147224 (PRPS1)**  
ENSG00000158604  
ENSG00000100170  
ENSG00000165886  
ENSG00000156860  
ENSG00000164742  
**ENSG00000120451 (SNX19)**  
ENSG00000181007  
ENSG00000198838  
ENSG00000168672  
ENSG00000090776

## References

- S1. H. Fu *et al.*, *FEBS Lett.* **579**, 3849 (2005).
- S2. J. Brennecke, A. Stark, R. B. Russell, S. M. Cohen, *PLoS Biol.* **3**, e85 (2005).
- S3. B. P. Lewis, C. B. Burge, D. P. Bartel, *Cell* **120**, 15 (2005).
- S4. N. Rajewsky, *Nat. Genet.* **38 Suppl**, S8 (2006).
- S5. P. Sethupathy, M. Megraw, A. G. Hatzigeorgiou, *Nature Methods* **3**, 881 (2006).
- S6. A. Stark, J. Brennecke, N. Bushati, R. B. Russell, S. M. Cohen, *Cell* **123**, 1133 (2005).
- S7. A. M. Cheng, M. W. Byrom, J. Shelton, L. P. Ford, *Nucleic Acids Res.* **33**, 1290 (2005).
- S8. Q. Wang *et al.*, *J. Biol. Chem.* **279**, 4952 (2004).
- S9. T. Lekishvili *et al.*, *Exp. Neurol.* **190**, 233 (2004).
